# Supplementary material for: A novel senescence-associated LncRNA signature predicts the prognosis and tumor microenvironment of patients with colorectal cancer: a bioinformatics analysis
Source: PubMed Central journal article supplement — J Gastrointest Oncol. 2022 Aug;13(4):1842–63. doi: 10.21037/jgo-22-721 (PMC9459181; doi:10.21037/jgo-22-721), 2022-08
Supplement: jgo-13-04-1842-supplementary.pdf [file jgo-13-04-1842-supplementary.pdf]

Table S1 Abnormal expression of senescence-related transcripts in tumor and normal tissues

| Gene     | conMean     | treatMean   | logFC        | pValue      | fdR         |
|----------|-------------|-------------|--------------|-------------|-------------|
| MYLK     | 45.43049286 | 4.835150165 | -3.232028356 | 1.60E-25    | 1.62E-24    |
| CPEB1    | 0.402928334 | 0.046320615 | -3.120796942 | 7.98E-29    | 2.23E-27    |
| CDKN2B   | 32.37764714 | 3.990329208 | -3.020418469 | 2.06E-30    | 1.13E-28    |
| SGK1     | 25.31700027 | 4.163838381 | -2.604120498 | 7.06E-22    | 3.71E-21    |
| BLK      | 1.029332885 | 0.196936563 | -2.385906734 | 4.56E-22    | 2.55E-21    |
| HEPACAM  | 0.067705676 | 0.014976986 | -2.176529439 | 2.58E-29    | 9.28E-28    |
| CAV1     | 42.28390084 | 10.5726715  | -1.999768514 | 2.15E-21    | 1.09E-20    |
| SORBS2   | 5.663105863 | 1.523380725 | -1.894316952 | 6.05E-15    | 1.71E-14    |
| TLR3     | 5.301437431 | 1.450407288 | -1.869925505 | 4.68E-28    | 7.86E-27    |
| IGFBP6   | 28.20628039 | 7.76090572  | -1.861719494 | 2.40E-25    | 2.32E-24    |
| CBX7     | 8.159114235 | 2.515163023 | -1.697760627 | 4.68E-28    | 7.86E-27    |
| AR       | 0.492513069 | 0.161111414 | -1.612103299 | 5.36E-17    | 1.69E-16    |
| HSPB2    | 1.021621635 | 0.343481753 | -1.572555617 | 6.15E-18    | 2.28E-17    |
| TXNIP    | 322.4641176 | 122.5332253 | -1.395965639 | 5.88E-25    | 4.94E-24    |
| TGFB111  | 14.43172265 | 5.521799767 | -1.386033039 | 3.37E-08    | 6.03E-08    |
| CKB      | 590.5438782 | 231.3862979 | -1.351740824 | 5.19E-17    | 1.66E-16    |
| KL       | 0.796593584 | 0.313891708 | -1.343576942 | 6.40E-22    | 3.43E-21    |
| LIMA1    | 61.89995059 | 25.37560233 | -1.28649619  | 2.47E-26    | 2.96E-25    |
| MAP4K1   | 2.885565627 | 1.216850354 | -1.245702384 | 2.16E-16    | 6.65E-16    |
| SOX5     | 0.253704752 | 0.114198858 | -1.151602321 | 4.44E-19    | 1.78E-18    |
| EPHA3    | 1.387124029 | 0.637708422 | -1.121127953 | 1.06E-09    | 1.99E-09    |
| RNASEL   | 4.587609235 | 2.133236738 | -1.104698431 | 5.62E-25    | 4.88E-24    |
| GNG11    | 8.266570039 | 3.892514827 | -1.086586317 | 6.15E-15    | 1.72E-14    |
| LGALS3   | 696.0402706 | 335.7918113 | -1.051603729 | 5.08E-22    | 2.78E-21    |
| NDRG1    | 79.36151608 | 38.96538565 | -1.026246491 | 9.78E-12    | 2.22E-11    |
| RPS6KA6  | 1.869534325 | 0.923512447 | -1.017475649 | 5.96E-16    | 1.81E-15    |
| CDKN1A   | 106.8041535 | 52.85281501 | -1.014915535 | 1.84E-18    | 7.14E-18    |
| RSL1D1   | 18.31646357 | 36.74097013 | 1.004248737  | 1.73E-22    | 1.02E-21    |
| PKM      | 76.27061373 | 153.3521255 | 1.007648949  | 2.96E-21    | 1.46E-20    |
| TFDP1    | 23.21378549 | 47.2365147  | 1.024920718  | 4.13E-25    | 3.71E-24    |
| ETS2     | 64.17043941 | 131.9216884 | 1.039701001  | 3.30E-17    | 1.11E-16    |
| TRIM28   | 54.49911569 | 115.3215212 | 1.081357046  | 8.02E-27    | 1.12E-25    |
| MAGOHB   | 1.82170582  | 3.866682047 | 1.085806136  | 3.40E-21    | 1.62E-20    |
| STK32C   | 1.71506149  | 3.721296257 | 1.117544947  | 3.60E-10    | 7.15E-10    |
| IFNG     | 0.153445475 | 0.334741148 | 1.125319804  | 0.000286479 | 0.000396663 |
| RUVBL2   | 19.48998235 | 42.60548464 | 1.128306377  | 3.50E-25    | 3.26E-24    |
| LIMK1    | 3.59932498  | 7.896085601 | 1.133411262  | 1.43E-25    | 1.50E-24    |
| PNPT1    | 4.671970941 | 10.26929847 | 1.136234423  | 5.11E-24    | 3.68E-23    |
| TACC3    | 5.017636157 | 11.1207995  | 1.148180745  | 9.05E-21    | 4.07E-20    |
| UBTD1    | 2.300482882 | 5.537005343 | 1.267169193  | 6.77E-18    | 2.47E-17    |
| BHLHE40  | 21.12079437 | 52.25496747 | 1.306904093  | 3.46E-20    | 1.48E-19    |
| CHEK1    | 1.966428306 | 4.915463019 | 1.321749732  | 9.71E-25    | 7.65E-24    |
| P3H1     | 1.78372751  | 4.463144372 | 1.323165235  | 2.01E-26    | 2.53E-25    |
| CDK4     | 15.04297863 | 37.6590247  | 1.323905377  | 3.23E-27    | 4.79E-26    |
| BRCA1    | 1.355655716 | 3.510378074 | 1.372635584  | 3.48E-23    | 2.19E-22    |
| EZH2     | 3.315433688 | 8.820953632 | 1.411737034  | 3.04E-28    | 6.38E-27    |
| PTTG1    | 8.478121627 | 22.87020411 | 1.431652673  | 1.75E-23    | 1.19E-22    |
| FOXM1    | 5.200558059 | 14.32978034 | 1.462278146  | 8.87E-24    | 6.21E-23    |
| NOTCH3   | 3.358027027 | 9.352483484 | 1.477735671  | 4.57E-17    | 1.48E-16    |
| MMP9     | 8.783467414 | 24.50809334 | 1.480395767  | 1.40E-06    | 2.23E-06    |
| MAD2L1   | 3.306140698 | 9.5602395   | 1.531898638  | 2.64E-23    | 1.71E-22    |
| CENPA    | 2.2021113   | 6.483885238 | 1.557971168  | 4.61E-26    | 5.28E-25    |
| RUNX1    | 1.856034906 | 5.497674539 | 1.566597659  | 3.40E-28    | 6.58E-27    |
| TFAP4    | 1.376152371 | 4.156225451 | 1.594633697  | 2.24E-30    | 1.13E-28    |
| CDK1     | 5.810577349 | 17.62087894 | 1.600532464  | 2.61E-23    | 1.71E-22    |
| TNFSF15  | 0.796106263 | 2.415190295 | 1.601103948  | 9.52E-27    | 1.26E-25    |
| CEBPB    | 11.47580922 | 36.32114263 | 1.6622137    | 5.63E-26    | 6.17E-25    |
| VEGFA    | 4.248134569 | 13.5360475  | 1.671905164  | 7.12E-29    | 2.23E-27    |
| AURKA    | 6.110931647 | 19.71822997 | 1.690065803  | 1.10E-27    | 1.74E-26    |
| CCND1    | 15.33640988 | 53.10542678 | 1.791898496  | 2.20E-30    | 1.13E-28    |
| HJURP    | 2.111342704 | 7.444368887 | 1.817988777  | 5.40E-30    | 2.27E-28    |
| TERT     | 0.176508797 | 0.62915223  | 1.833669048  | 1.22E-12    | 2.94E-12    |
| CBX8     | 1.153757884 | 4.172307006 | 1.854504811  | 4.45E-31    | 5.61E-29    |
| SNAI1    | 1.1937992   | 4.346164595 | 1.86418262   | 6.73E-25    | 5.47E-24    |
| E2F1     | 3.845043569 | 15.03910215 | 1.967646589  | 1.09E-28    | 2.75E-27    |
| PROX1    | 1.216173559 | 5.064445645 | 2.058055231  | 1.89E-18    | 7.21E-18    |
| MYC      | 25.8873938  | 108.7104266 | 2.070168683  | 2.96E-28    | 6.38E-27    |
| SERPINE1 | 3.787122227 | 16.47001324 | 2.120667825  | 1.47E-17    | 5.08E-17    |
| AGT      | 2.876721755 | 14.71928098 | 2.355209608  | 1.09E-20    | 4.81E-20    |
| IL1A     | 0.222925151 | 1.485337668 | 2.736159641  | 1.38E-16    | 4.31E-16    |
| CXCL1    | 8.824251016 | 70.13724454 | 2.990635017  | 2.44E-24    | 1.81E-23    |
| CDKN2A   | 0.292369631 | 2.457387506 | 3.071260004  | 5.61E-21    | 2.57E-20    |
| NOX4     | 0.057027145 | 0.497853395 | 3.126000245  | 1.86E-22    | 1.07E-21    |
| TERC     | 0.019464609 | 0.209878939 | 3.430632144  | 0.000147604 | 0.000206645 |
| SIX1     | 0.013375334 | 0.190589077 | 3.832818599  | 5.18E-23    | 3.19E-22    |
| VENTX    | 0.133137618 | 2.004532996 | 3.912276002  | 1.90E-10    | 3.87E-10    |
| IGFBP1   | 0.041727639 | 0.633491403 | 3.924249828  | 3.72E-05    | 5.48E-05    |
| SLC13A3  | 0.08482972  | 1.771167386 | 4.383986957  | 1.83E-14    | 5.00E-14    |
| WT1      | 0.017495718 | 0.600501925 | 5.101095062  | 7.73E-18    | 2.78E-17    |
| WNT2     | 0.070308335 | 3.466901798 | 5.62380744   | 2.62E-32    | 6.59E-30    |

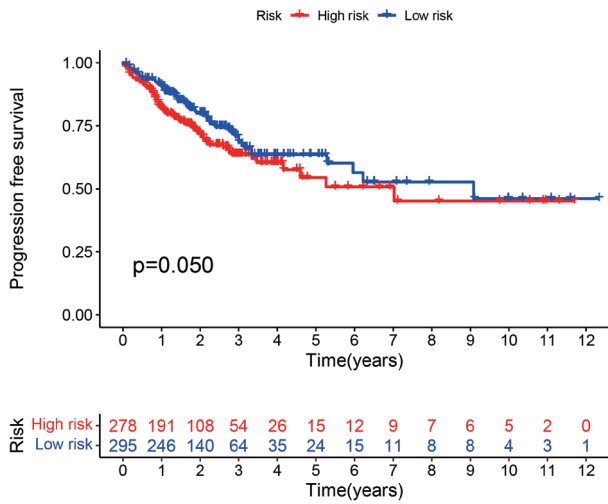

**Figure S1** Progression-free survival (PFS) analysis by the SenALSig model using the TCGA-CRC samples. The P value was generated by the log-rank test.

**Table S2** The qPCR primer sequences of the six lncRNAs in the SenALSig model

| LncRNA     | Forward                  | Reverse               |
|------------|--------------------------|-----------------------|
| AC068580.3 | CCATTGGGTTAAGATACGAGAGTC | AGGGAGGGGACACCCAAAT   |
| SNHG16     | AAGACATGGCCACTCCAGTC     | AGGCTGACTGCACCATCATC  |
| AL590483.1 | AGACTCCAAATACCTTGAGCATGT | AGGGGCCAGATGAAATGATCC |
| ZEB1-AS1   | GGCTGATTCTCCCTGTACCC     | GGTTCTACGCGAGGAAGAGG  |
| AC107375.1 | ACTTCTCTCGCCCTGAGGAT     | GTTGGCTTCCTGCACACAAG  |
| AC147067.1 | AGAGGATAGGCAGGTGCAGA     | AGTCGGGGTCGATGGTTCTA  |

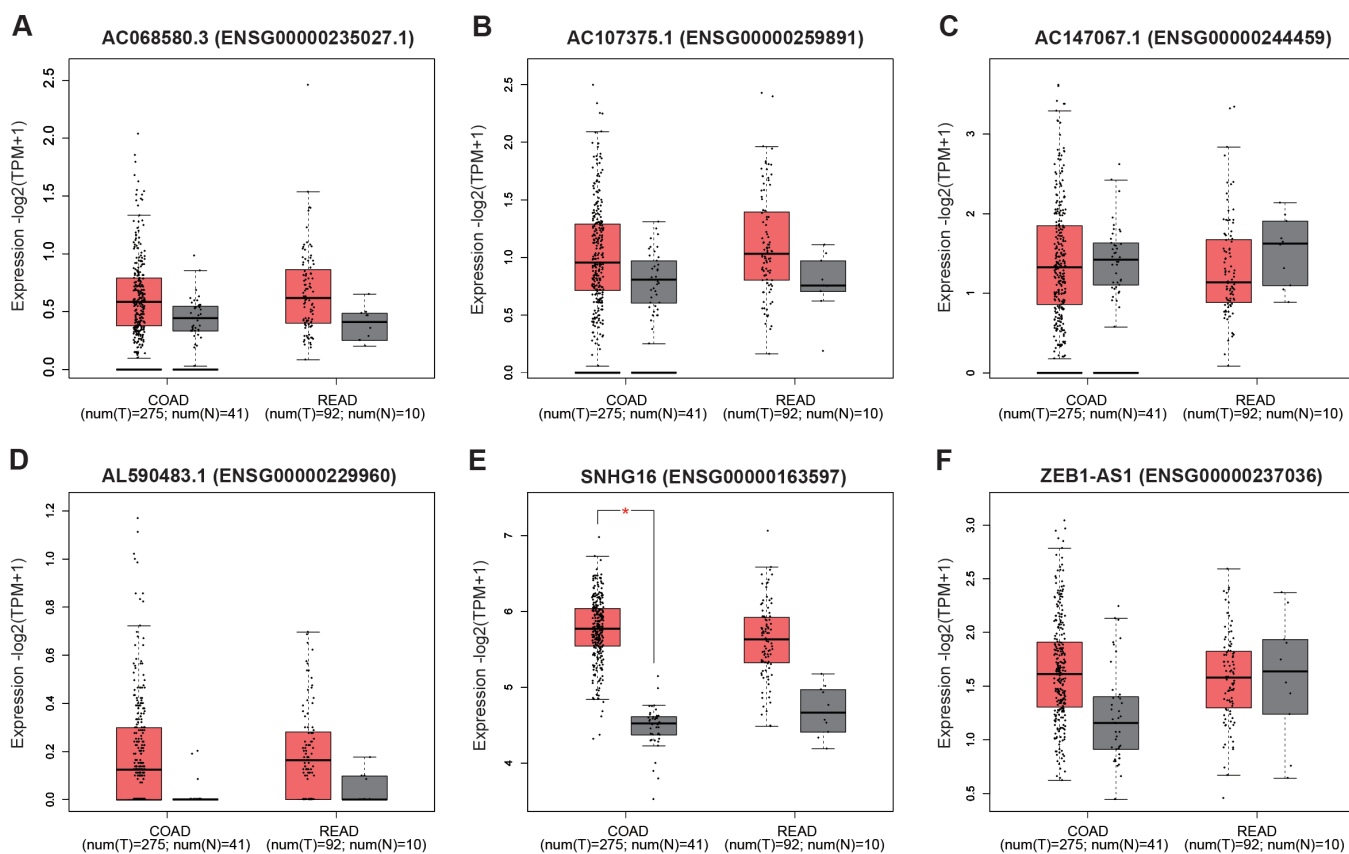

**Figure S2** The online tool GEPIA2 ([gepia2.cancer-pku.cn](http://gepia2.cancer-pku.cn)) is used to analyze the different expressions of the six lncRNAs in the CRC data set of TCGA. COAD, colon adenocarcinoma; READ, rectum adenocarcinoma; num, sample size number; T, tumor tissues; N, normal tissues. \*, P value <0.05.
